# Supplementary material for: Optimal d-band-induced Cu3N as a cocatalyst on metal sulfides for boosting photocatalytic hydrogen evolution
Source: Royal Society of Chemistry journal article supplement (doi:10.1039/d0ta07916b), 2020-01-01
Supplement: d0ta07916b1.pdf [file d0ta07916b1.pdf]

## *Electronic Supplementary Information*

### **Optimal d-band-Induced Cu<sub>3</sub>N as Cocatalyst on Metal Sulfide for Boosting Photocatalytic Hydrogen Evolution**

Qing Guo,<sup>a,b</sup> Fei Liang,<sup>c</sup> Zongzhao Sun,<sup>a</sup> Yang Wang,<sup>d</sup> Xubing Li,<sup>d</sup> Shuguang Xia,<sup>d</sup> Z. Conrad Zhang,<sup>b</sup>  
Limin Huang<sup>\*,a</sup> and Li-Zhu Wu<sup>d</sup>

*<sup>a</sup>Department of Chemistry, Southern University of Science and Technology, Shenzhen, 518055, China*

*<sup>b</sup>State Key Laboratory of Catalysis, Dalian Institute of Chemical Physics, Chinese Academy of Sciences, Dalian 116023, China*

*<sup>c</sup>State Key Laboratory of Crystal Materials and Institute of Crystal Materials, Shandong University, Jinan 250100, China*

*<sup>d</sup>Key Laboratory of Photochemical Conversion and Optoelectronic Materials, Technical Institute of Physics and Chemistry, Chinese Academy of Sciences, Beijing 100190, China*

\*To whom correspondence should be addressed.

*E-mail:* huanglm@sustech.edu.cn.

## Table of Contents

1. Synthesis of  $\text{Cu}_3\text{N}$  NCs
2. Synthesis of  $\text{Cu}_2\text{O}$
3. Synthesis of  $\text{Cu}_2\text{S}$
4. Synthesis of  $\text{Cu}_3\text{P}$
5. Synthesis of  $\text{CdS}/\text{Cu}_3\text{N}$
6. Photocatalytic hydrogen production
7. The measurement of apparent quantum yield (AQY)
8. Long-time photocatalytic  $\text{H}_2$  evolution
9. Photoelectrochemical measurements
10. DFT calculations
11. The calculated band structure of  $\text{Cu}_3\text{N}$
12. The calculated pDOS of  $\text{Cu}_3\text{N}$
13. Crystal structure of obtained  $\text{Cu}_3\text{N}$
14. Full XPS spectrum of  $\text{Cu}_3\text{N}$
15. TEM images of  $\text{CdS}$  and  $\text{CdS}/\text{Cu}_3\text{N}$
16. XRD patterns of various  $\text{CdS}/x\text{Cu}_3\text{N}$  with different mass ratios
17. The corresponding lattice distances of  $\text{CdS}/\text{Cu}_3\text{N}$
18. EDX spectrum of  $\text{CdS}/\text{Cu}_3\text{N}$
19. XPS spectra of  $\text{CdS}/\text{Cu}_3\text{N}$
20. High-resolution XPS spectra of  $\text{Cu}$  2p for  $\text{CdS}/\text{Cu}_3\text{N}$
21. Mass ratios of  $\text{Cu}_3\text{N}$  to  $\text{CdS}$  determined by ICP-AES
22. UV-vis spectra of various  $\text{CdS}/x\text{Cu}_3\text{N}$  with different mass ratios
23. Comparison of photocatalytic activity with reported  $\text{CdS}$ -based system
24. Wavelength-dependent activity of  $\text{CdS}/\text{Cu}_3\text{N}$  for  $\text{H}_2$  production
25. Stability of  $\text{CdS}/\text{Cu}_3\text{N}$  for  $\text{H}_2$  production
26. XRD pattern of recycled  $\text{CdS}/\text{Cu}_3\text{N}$
27. Elemental mapping of recycled  $\text{CdS}/\text{Cu}_3\text{N}$
28. XRD patterns of  $\text{Cu}_2\text{O}$ ,  $\text{Cu}_2\text{S}$  and  $\text{Cu}_3\text{P}$
29. Comparison activity of  $\text{Cu}_3\text{N}$  with other  $\text{Cu(I)}$ -based cocatalyst

30. UV-vis diffuse reflectance spectra and corresponding *Tauc* Plots of CdS/Cu<sub>3</sub>N
31. Mott-Schottky plots of CdS/Cu<sub>3</sub>N
32. Band structure diagram of CdS/Cu<sub>3</sub>N
33. Fitted parameter of PL lifetime in Figure 4b
34. References

**1. Synthesis of Cu<sub>3</sub>N NCs:** Cubic phase Cu<sub>3</sub>N nanocrystals were synthesized by reported methods.<sup>1</sup> Briefly, 60 mg Cu(NO<sub>3</sub>)<sub>2</sub>·2.5H<sub>2</sub>O was dissolved in 5 mL oleylamine and 5 mL 1-octadecene. The solution was degassed under vacuum for 30 min. Then the flask was filled with highly pure argon (Ar) and heated at 150 °C for 3 h by heating mantle under magnetic stirring, in which the color of the solution changed from blue to green, and finally to yellow. After that, the solution was heated to 250 °C and kept at this temperature for 30 min. Subsequently, the heating mantle was removed and the flask was cooled down. The product was collected by centrifugation (12000 rpm, 10 min), washed with ethanol several times and finally dried at 60 °C under vacuum.

**2. Synthesis of Cu<sub>2</sub>O:** Cu<sub>2</sub>O was synthesized according to previous methods.<sup>2</sup> A mixture of Cu(NO<sub>3</sub>)<sub>2</sub>·2.5H<sub>2</sub>O (1.0 g) and octadecylamine (ODA, 8.6 g) was placed in a flask and degassed under vacuum for 30 min. Then the flask was filled with Ar and heated at 240 °C for 10 min by heating mantle under magnetic stirring. Subsequently, heating mantle was removed and the flask was cooled down. The product was washed with ethanol several times and finally dried at 60 °C under vacuum.

**3. Synthesis of Cu<sub>2</sub>S:** Cu<sub>2</sub>S was prepared by reported methods.<sup>3</sup> Firstly, Cu(NO<sub>3</sub>)<sub>2</sub>·2.5H<sub>2</sub>O (232 mg) was dissolved in deionized water (20 mL) to form a clear blue solution. Then, CH<sub>3</sub>COONa (82 mg) and CH<sub>3</sub>COOH (600 μL) were added into the above blue solution. After stirring for 15 min, it was transferred into a Teflon-lined autoclave and dodecanethiol (3 mL) was introduced. The solution was heated at 200 °C for 6 h. After cooling to room temperature, the product was collected by centrifugation (6000 rpm, 5 min) and washed with ethanol for several times. Finally, the product was dried at 60 °C for further use.

**4. Synthesis of Cu<sub>3</sub>P:** Cu<sub>3</sub>P was prepared according to literature methods.<sup>4</sup> In briefly, 1.16 g Cu(NO<sub>3</sub>)<sub>2</sub>·2.5H<sub>2</sub>O was dissolved in 100 mL deionized water to form a clear solution. NaOH aqueous solution (0.25 mol/L, 20 mL) was introduced under magnetic stirring. After stirring for 2 h, precipitates of Cu(OH)<sub>2</sub> were collected by centrifugation and dried under vacuum. Then, the obtained Cu(OH)<sub>2</sub> (250 mg) was mixed with NaH<sub>2</sub>PO<sub>2</sub> (2.5 g) and calcined at 300 °C for 1 h with a heating rate of 2.0 °C min<sup>-1</sup> under Ar atmosphere. After that, the samples were collected and washed with water and ethanol for further applications.

**5. Synthesis of CdS/Cu<sub>3</sub>N:** firstly, Cd(CH<sub>3</sub>COO)<sub>2</sub> (368 mg) and thiourea (420 mg) were dissolved in deionized water (30 mL) to form a clear solution.<sup>5</sup> Then, 3.0 mg Cu<sub>3</sub>N was dispersed into the solution through ultrasonication. After that, the solution was transferred into a Teflon-lined autoclave and kept at 180 °C for 12 h. The product was collected by centrifugation (8000 rpm, 5 min) and washed with water and ethanol several times. Finally, the product was dried at 60 °C for further characterizations and uses. The dosages of added Cu<sub>3</sub>N were 0, 1.0, 2.0, 3.0, 5.0 and 9.0 mg, and the resulting mass ratios of Cu<sub>3</sub>N to CdS were 0, 0.8, 1.3, 2.0, 3.1 and 3.9 wt%, respectively.

For the synthesis of CdS/Cu<sub>2</sub>O, CdS/Cu<sub>2</sub>S and CdS/Cu<sub>3</sub>P, 3.0 mg Cu<sub>2</sub>O, Cu<sub>2</sub>S and Cu<sub>3</sub>P were introduced respectively, instead of Cu<sub>3</sub>N, and other procedures were similar to above.

**6. Photocatalytic hydrogen production:** the solar H<sub>2</sub> generation reaction was conducted in a closed glass reaction system (CEL-SPH2N, CEAULIGHT, Beijing). First of all, 10.0 mg photocatalyst CdS/Cu<sub>3</sub>N was dispersed in 40.0 mL ascorbic acid (AA) aqueous solution (0.1 mol/L, pH = 5.0). Then, the air in reactor was evacuated using a vacuum pump for 15 min. After that, the reactor was irradiated by a 300 W Xe lamp with a cut-off filter of 400 nm. The generated molecular H<sub>2</sub> in the reactor system was measured using an online gas chromatograph system (*Shimadzu* GC2014CAFC/APC) equipped with a thermal conductivity detector and a 5 Å molecular sieves GC column. Ar was used as a carrier gas. Error bars on H<sub>2</sub> were calculated from at least three independent experiments. For the wavelength-dependent activities were measured using a bandpass filter of 420 nm, 450 nm, 500 nm, and 600 nm, respectively, instead of cut-off filter of 400 nm and other procedures were similar to above.

**7. The measurement of apparent quantum yield (AQY):** Briefly, 2.5 mL ascorbic acid (AA) aqueous solution (1.0 mol/L, pH = 5.0) containing 0.5 mg photocatalyst CdS/Cu<sub>3</sub>N was placed in a sealed quartz cuvette with 1-cm path length. Then, the system was irradiated under 450 nm LEDs (100 mW · cm<sup>-2</sup>) with a fixed irradiation area of 1.57 cm<sup>2</sup>. The evolved H<sub>2</sub> gas during 2.0 h was analyzed by GC. As a result, the number of absorbed photons could be calculated as the following equation:

$$N_{\text{photon}} = \frac{t(s) \times P(W \cdot \text{cm}^{-2}) \times S(\text{cm}^2) \times \lambda(m)}{h(J \cdot s) \times c(m \cdot s^{-1})}$$

$$= \frac{2 \times 3600(s) \times 100 \times 10^{-3} (W \cdot cm^{-2}) \times 1.57(cm^2) \times 450 \times 10^{-9}(m)}{6.626 \times 10^{-34} (J \cdot s) \times 3 \times 10^8 (m \cdot s^{-1})}$$

$$= 2.56 \times 10^{21}$$

So, the apparent quantum yield (AQY) of photocatalytic H<sub>2</sub> evolution was calculated as the following equation:

$$AQY = \frac{2n(H_2) \times 6.02 \times 10^{23}}{N_{photon}} \times 100\%$$

For the CdS/Cu<sub>3</sub>N system, about 82.78 μmol of H<sub>2</sub> was produced in 2.0 h. Herein, the AQY can be calculated as follows:

$$AQY = \frac{2 \times 82.78 \times 10^{-6} (mol) \times 6.02 \times 10^{23} / mol}{2.56 \times 10^{21}} \times 100\%$$

$$= 3.9\%$$

**8. Long-time photocatalytic H<sub>2</sub> evolution:** firstly, 100.0 mg CdS/Cu<sub>3</sub>N was dispersed in 50.0 mL AA aqueous solution (1.0 mol/L, pH = 5.0). The air in reactor was then evacuated using a vacuum pump for 15 min. The photocatalytic experiment was carried out under the irradiation of Xe lamp with a cut-off filter of 400 nm (300 W). The produced H<sub>2</sub> was detected every 0.5 h by an online gas chromatograph (*Shimadzu GC2014CAFC/APC*). After the irradiation for 1.5 h, additional 5.0 mL AA (1.0 mol/L, pH = 5.0) was added to the system, the reactor was degassed under vacuum. Then the system was irradiated under Xe lamp and repeated several times.

**9. Photoelectrochemical measurements:** all experiments were performed on an electrochemical workstation (Germany, Zahner Company) in a conventional three-electrode system. The resultant electrode served as the working electrode, platinum as the counter electrode and Ag/AgCl (3.0 M KCl) electrode as the reference electrode. A 20 W blue LED (λ = 450 nm) was used as the light source. A 0.5 M Na<sub>2</sub>SO<sub>4</sub> aqueous solution was used as the electrolyte. The working electrodes were prepared by adding 8 μL Nafion (5%) aqueous solution into a 1 mL CdS/Cu<sub>3</sub>N solution. Then 3.0 μL obtained solution was dropped onto a clean glassy carbon electrode with an active area of about 0.07 cm<sup>2</sup>, which was cleaned before experiments by ultrasonication with distilled water, ethanol and isopropanol for 15 s, and dried in a vacuum.

## 10. DFT calculations

**Details:** the first principles calculations were carried out by the Materials Studio package.<sup>6</sup> The ion-core interaction was modeled by ultrasoft pseudopotentials<sup>7</sup> and the exchange–correlation (XC) functionals were described by the generalized gradient approximation (GGA) PW91 functional.<sup>8</sup> A 600 eV of cutoff energy was used throughout our calculations. The convergence thresholds between optimization cycles for energy change and maximum force were set as  $5.0 \times 10^{-6}$  eV/atom and 0.03 eV/Å, respectively. For bulk band structure calculations, an ultrafine smearing value of 0.001 Å<sup>-1</sup> was selected to obtain accurate band gap and dispersion, where the Cu<sub>3</sub>N (Pm-3m), Cu<sub>3</sub>P (P-3c1), Cu<sub>2</sub>O (Pn-3m) and Cu<sub>2</sub>S (P63mmc) crystal structure were utilized.

In Gibbs energy  $\Delta G$  calculations, a vacuum thickness of 13 Å was added to avoid the interaction of adjacent layers. In all calculations, the atoms in the bottom layers were fixed, but the atoms in the three topmost layers, as well as H atoms, were allowed to be relaxed. The dense Monkhorst-Pack grids<sup>9</sup> of  $4 \times 4 \times 1$  k-points were applied for the Cu<sub>3</sub>N (100), Cu<sub>3</sub>P (100), Cu<sub>2</sub>O (100) and Cu<sub>2</sub>S (001) surface. The DOS projected onto the d-states that interact with the adsorbate state can be characterized by the moments  $n_d(\epsilon)$  of the d DOS. The  $\epsilon$  is the energy scale. The d-band center of four catalysts was calculated by formula (1):<sup>10</sup>

$$\epsilon_d = \frac{\int_{-\infty}^{+\infty} n_d(\epsilon) \epsilon d\epsilon}{\int_{-\infty}^{+\infty} n_d(\epsilon) d\epsilon} \quad (1)$$

The adsorption energy and Gibbs energy  $\Delta G$  were defined in formula (2) and (3), respectively.

$$\Delta G = E_{ads} + \Delta ZPE - T\Delta S \quad (2)$$

in which  $\Delta ZPE - T\Delta S$  can be assumed to be 0.24 eV<sup>11</sup> for H atom and

$$E_{ads} = E_{(H+slab)} - \left[ \frac{1}{2} E_{(H_2)} + E_{(slab)} \right] \quad (3)$$

where the first term is the total energy of the slab with the adsorbed H<sup>+</sup> on the surface, the second term is the total energy of isolated H<sub>2</sub> molecule, and the third term is the total energy of the bare slab of the surface. According to the above definitions, a negative  $E_{ads}$  value corresponds to an exothermic adsorption, and the more negative the  $E_{ads}$ , the stronger the adsorption.

11. The calculated band structure of  $\text{Cu}_3\text{N}$

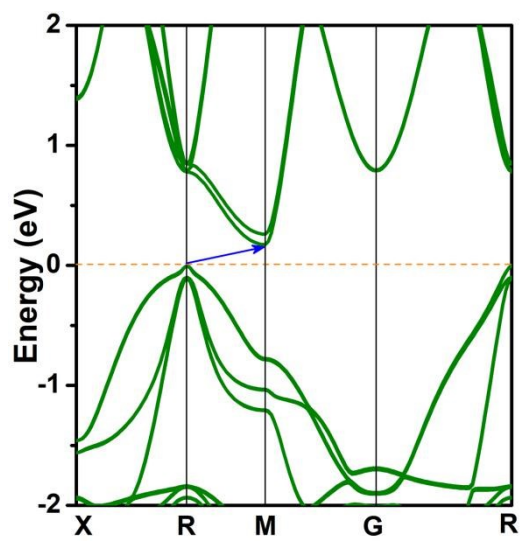

Fig. S1 The calculated band structure of  $\text{Cu}_3\text{N}$ .



12. The calculated PDOS of Cu<sub>3</sub>N

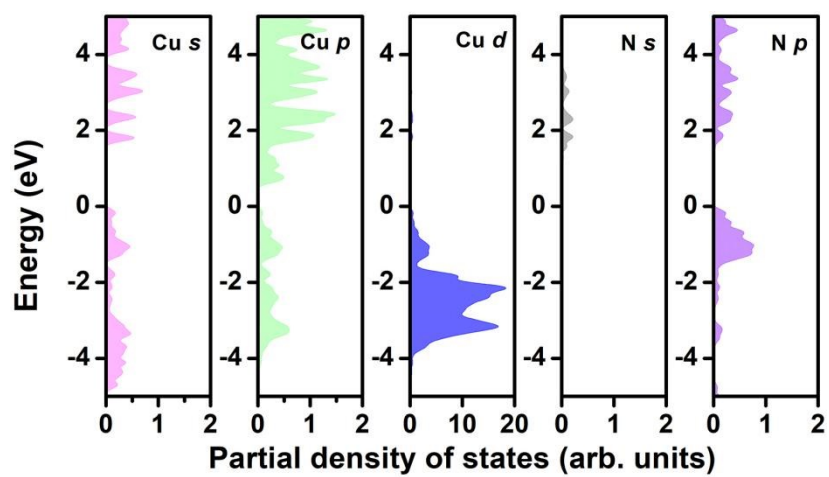

Fig. S2 The partial density of states (PDOS) of Cu<sub>3</sub>N.

### 13. Crystal structure of obtained $\text{Cu}_3\text{N}$

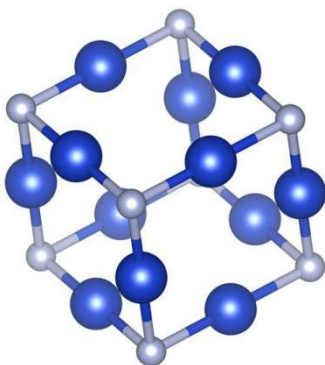

**Fig. S3** The corresponding crystal structure of synthesized  $\text{Cu}_3\text{N}$  nanocrystals, showing perovskite-type  $Pm3m$  structure. Blue and gray balls denote Cu and N atoms, respectively.

#### 14. Full XPS spectrum of $\text{Cu}_3\text{N}$

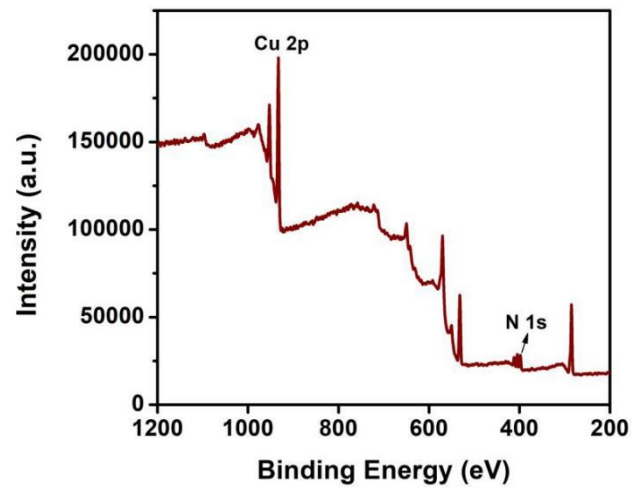

**Fig. S4** Full XPS spectrum of obtained  $\text{Cu}_3\text{N}$ , indicating that both of Cu and N elements are found in the spectrum.

### 15. TEM images of CdS and CdS/Cu<sub>3</sub>N

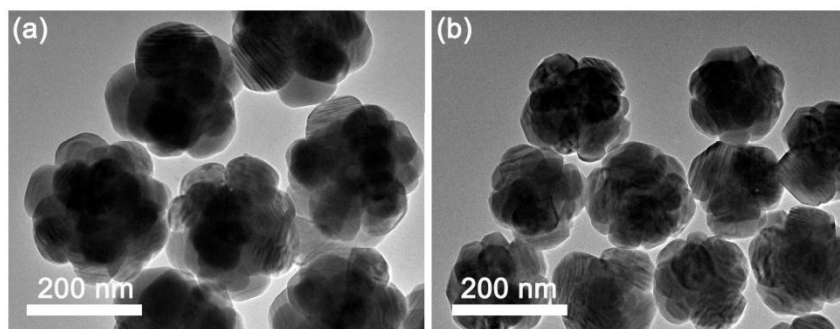

**Fig. S5** TEM images of (a) CdS and (b) CdS/Cu<sub>3</sub>N. As shown in Fig. S5, the flower-like morphology of CdS/Cu<sub>3</sub>N is similar to that of CdS. However, the rough surface of CdS/Cu<sub>3</sub>N was observed, indicating the integration of Cu<sub>3</sub>N with CdS.

## 16. XRD patterns of various CdS/ $x$ Cu<sub>3</sub>N with different mass ratios

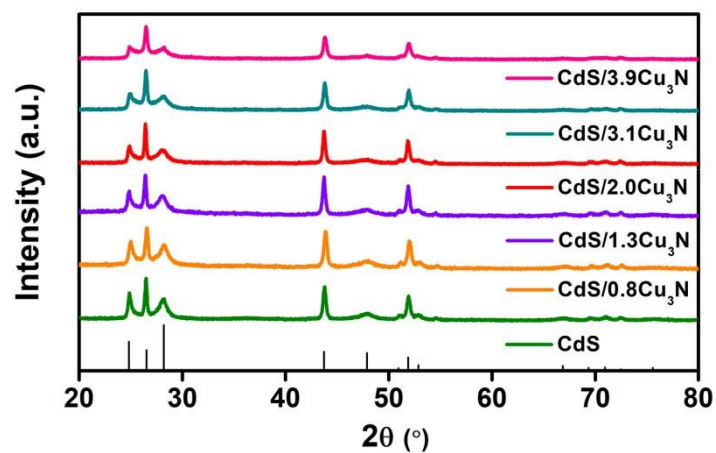

**Fig. S6** XRD patterns of CdS/ $x$ Cu<sub>3</sub>N, where  $x$  denoting the mass ratio (wt.%) of Cu<sub>3</sub>N to CdS. As shown in Fig. S6, the diffraction peaks show little change with the introduction of Cu<sub>3</sub>N, due to the low loading and high dispersion of Cu<sub>3</sub>N.

17. The corresponding lattice distances of CdS/Cu<sub>3</sub>N.

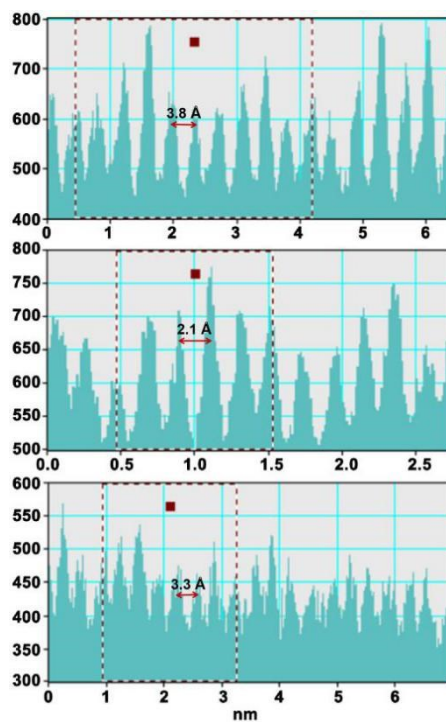

**Fig. S7** The corresponding lattice distances of the exposed (100) and (111) planes of Cu<sub>3</sub>N, and (002) plane of CdS in CdS/Cu<sub>3</sub>N, respectively, in Fig. 2c.

## 18. EDX spectrum of CdS/Cu<sub>3</sub>N

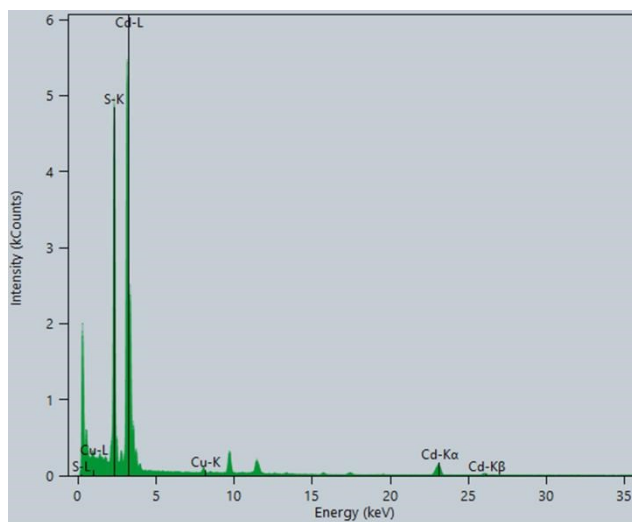

**Fig. S8** EDX spectrum of obtained CdS/Cu<sub>3</sub>N. As shown in Fig. S8, the EDX spectrum of prepared CdS/Cu<sub>3</sub>N indicates the coexistence of elements Cd, S and Cu, implying the successful coupling of Cu<sub>3</sub>N with CdS.

19. XPS spectrum of CdS/Cu<sub>3</sub>N

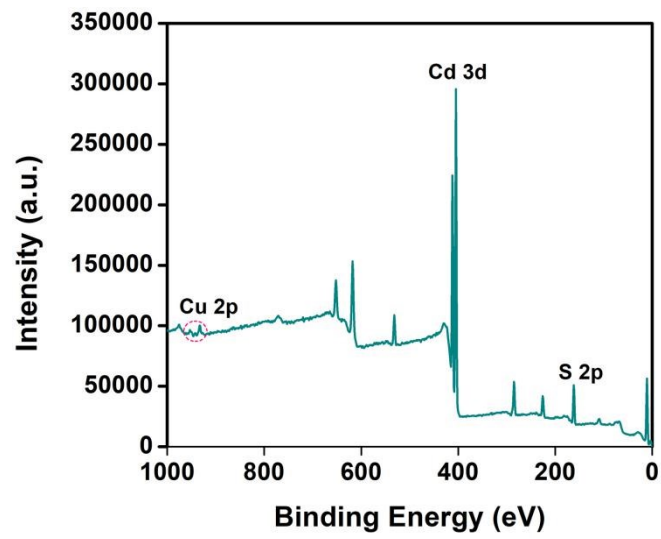

**Fig. S9** Full XPS spectrum of the obtained CdS/Cu<sub>3</sub>N, indicating that Cd, S and Cu elements are found in the spectrum.



## 20. High-resolution XPS spectra of Cu 2p in CdS/Cu<sub>3</sub>N

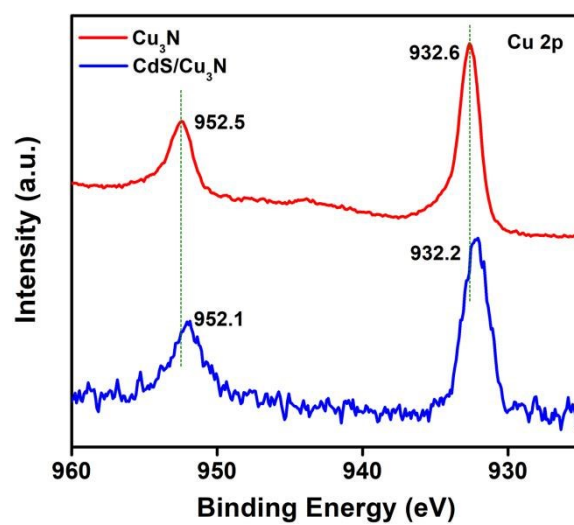

**Fig. S10** High-resolution XPS spectra of Cu 2p for CdS/Cu<sub>3</sub>N and Cu<sub>3</sub>N. As shown in Fig. S10, the peaks of Cu (I) in Cu<sub>3</sub>N are red shifted to ~932.2 and ~952.1 eV after integrated with CdS, further confirming the interaction of Cu<sub>3</sub>N with CdS.<sup>12</sup>

**21. Table. S1 Mass ratios of Cu<sub>3</sub>N to CdS determined by ICP-AES**

| <b>Samples</b>                | <b>Dosage of Cu<sub>3</sub>N (mg)</b> | <b>Cu<sub>3</sub>N (wt.%)</b> |
|-------------------------------|---------------------------------------|-------------------------------|
| <b>CdS</b>                    | <b>0</b>                              | <b>0</b>                      |
| <b>CdS/0.8Cu<sub>3</sub>N</b> | <b>1.0</b>                            | <b>0.8</b>                    |
| <b>CdS/1.3Cu<sub>3</sub>N</b> | <b>2.0</b>                            | <b>1.3</b>                    |
| <b>CdS/2.0Cu<sub>3</sub>N</b> | <b>3.0</b>                            | <b>2.0</b>                    |
| <b>CdS/3.1Cu<sub>3</sub>N</b> | <b>5.0</b>                            | <b>3.1</b>                    |
| <b>CdS/3.9Cu<sub>3</sub>N</b> | <b>9.0</b>                            | <b>3.9</b>                    |

## 22. UV-vis spectra of various CdS/xCu<sub>3</sub>N with different mass ratios

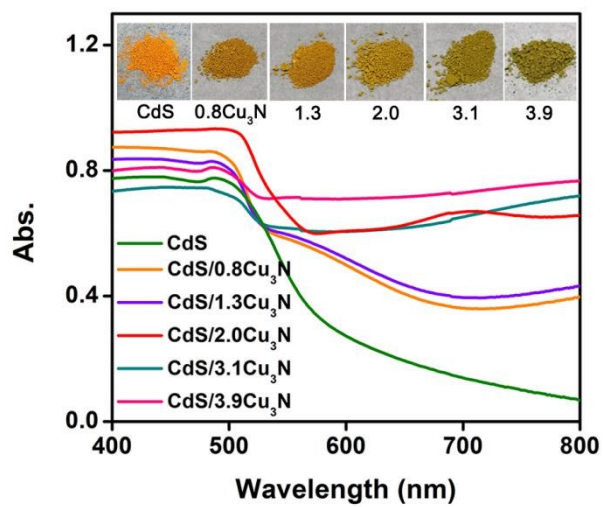

**Fig. S11** UV-vis spectra of CdS/xCu<sub>3</sub>N (x denoting the mass ratio (wt.%) of Cu<sub>3</sub>N to CdS) samples with different dosages of Cu<sub>3</sub>N. The inset shows the colors of the above samples.

**23. Table. S2 Comparison of photocatalytic activity with reported CdS-based system**

| Photocatalysts             | Electron donor                                                      | Light source         | H <sub>2</sub> generation rate (mmol g <sup>-1</sup> h <sup>-1</sup> ) | Enhancement factor | AQY (%)             | Reference                                                         |
|----------------------------|---------------------------------------------------------------------|----------------------|------------------------------------------------------------------------|--------------------|---------------------|-------------------------------------------------------------------|
| CdS/C60/TiO <sub>2</sub>   | 0.25 M Na <sub>2</sub> S,<br>0.35 M Na <sub>2</sub> SO <sub>3</sub> | 350 W Xe lamp        | 0.12                                                                   | 8.5                | 2.0 (420 nm)        | <i>ACS Appl. Mater. Interfaces</i> <b>2015</b> , <i>7</i> , 4533. |
| CdS/Sn <sup>2+</sup>       | glycerol                                                            | 350 W Xe lamp        | 1.61                                                                   | 24                 | 10.9 (420 nm)       | <i>Small</i> <b>2020</b> , <i>16</i> , 2001024.                   |
| CdS/NiS                    | lactic acid                                                         | 300 W Xe lamp        | 158.7                                                                  | 250                | 74.1 (420 nm)       | <i>Chem. Sci.</i> , <b>2018</b> , <i>9</i> , 1574.                |
| CdS/MoS <sub>2</sub>       | lactic-acid                                                         | 300 W Xe lamp        | 6.02                                                                   | 28                 | 22.0 (475 nm)       | <i>Nano Res.</i> <b>2017</b> , <i>10</i> , 1377.                  |
| CdS/Mo <sub>2</sub> N      | 1.0 M Na <sub>2</sub> S,<br>1.0 M Na <sub>2</sub> SO <sub>3</sub>   | 300 W Xe lamp        | 0.97                                                                   | 6.1                | 2.2 (420 nm)        | <i>Int. J. Hydrogen Energy</i> <b>2016</b> , <i>41</i> , 22009.   |
| CdS/Ni                     | methanol                                                            | 300 W Xe lamp        | 3.74                                                                   | 133                | 2.2 (400 nm)        | <i>Int. J. Hydrogen Energy</i> <b>2015</b> , <i>40</i> , 998.     |
| CdS/Pt                     | lactic acid                                                         | 300 W Xe lamp        | 16.27                                                                  | 7.7                | N/A                 | <i>J. Mater. Chem. A</i> , <b>2015</b> , <i>3</i> , 23732.        |
| CdS/CuS                    | 0.25 M Na <sub>2</sub> S,<br>0.35 M Na <sub>2</sub> SO <sub>3</sub> | 500 W Xe lamp        | 0.33                                                                   | 3.5                | N/A                 | <i>Int. J. Hydrogen Energy</i> <b>2013</b> , <i>38</i> , 11811.   |
| <b>CdS/Cu<sub>3</sub>N</b> | <b>ascorbic acid</b>                                                | <b>300 W Xe lamp</b> | <b>4.5</b>                                                             | <b>851</b>         | <b>3.9 (450 nm)</b> | <b>this work</b>                                                  |

#### 24. Wavelength-dependent activity of CdS/Cu<sub>3</sub>N for H<sub>2</sub> production

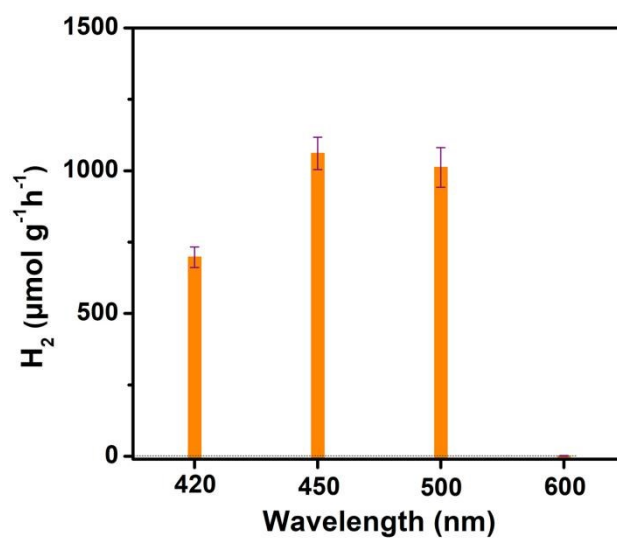

Fig. S12 Wavelength-dependent activity of CdS/Cu<sub>3</sub>N for H<sub>2</sub> generation.

## 25. Stability of CdS/Cu<sub>3</sub>N for H<sub>2</sub> production

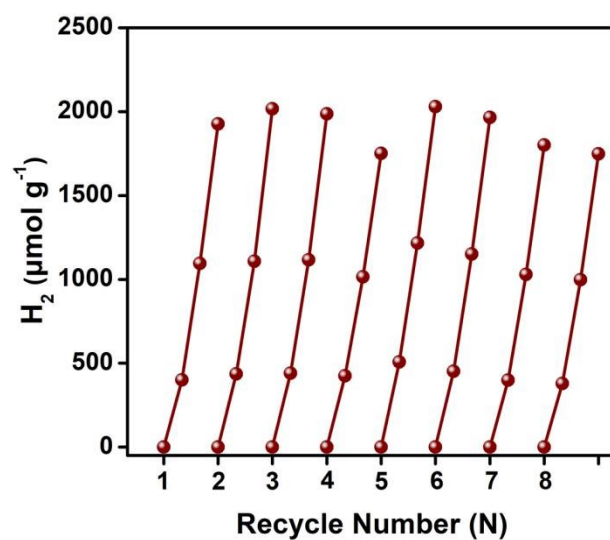

**Fig. S13** Stability of photocatalytic H<sub>2</sub> evolution reaction using CdS/Cu<sub>3</sub>N as a photocatalyst and ascorbic acid as a sacrificial reagent. As shown in Fig. S13, even after 8 cycles of the photocatalytic reaction, the system remains 91% of the initial H<sub>2</sub> evolution activity, signifying an excellent stability.

26. XRD pattern of recycled CdS/Cu<sub>3</sub>N

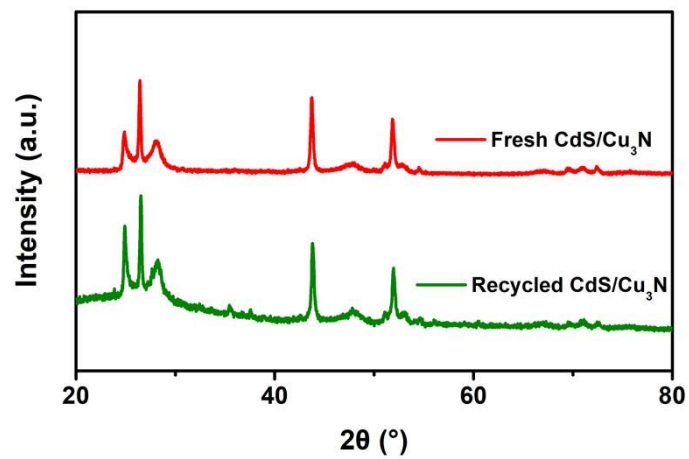

Fig. S14 XRD pattern of fresh and recycled CdS/Cu<sub>3</sub>N after 8 cycle tests.

## 27. Elemental mapping of recycled CdS/Cu<sub>3</sub>N

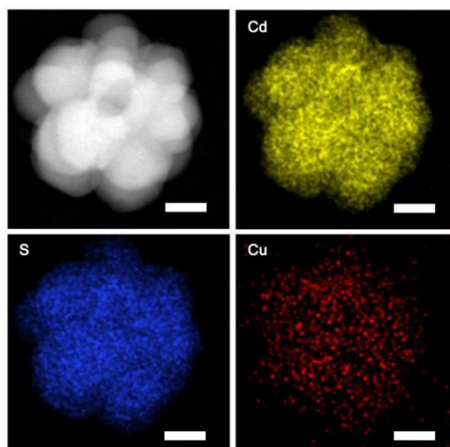

**Fig. S15** TEM image of recycled CdS/Cu<sub>3</sub>N architecture and corresponding elemental mapping of Cd, S and Cu, respectively.



## 28. XRD patterns of $\text{Cu}_2\text{O}$ , $\text{Cu}_2\text{S}$ and $\text{Cu}_3\text{P}$

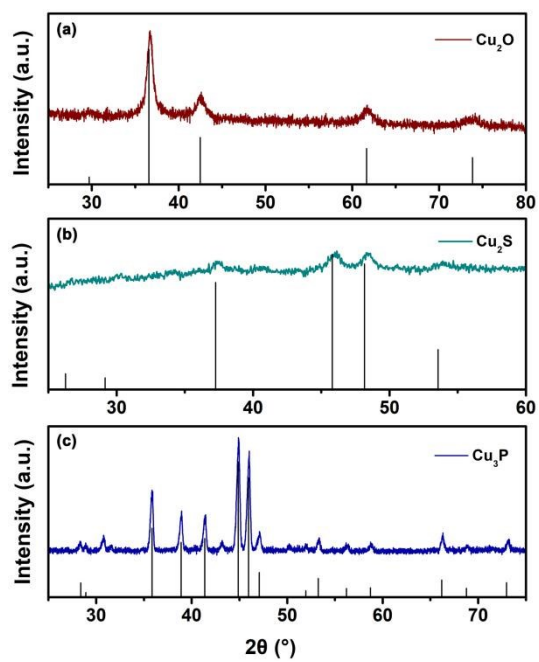

**Fig. S16** XRD patterns of the prepared (a)  $\text{Cu}_2\text{O}$ , (b)  $\text{Cu}_2\text{S}$  and (c)  $\text{Cu}_3\text{P}$ , which match well with the standard  $\text{Cu}_2\text{O}$  (PDF No. 74-1230),  $\text{Cu}_2\text{S}$  (PDF No. 84-0206) and  $\text{Cu}_3\text{P}$  (PDF No. 74-1067), respectively.<sup>3-5</sup>

## 29. Activity comparison of Cu<sub>3</sub>N with other Cu(I)-based cocatalysts

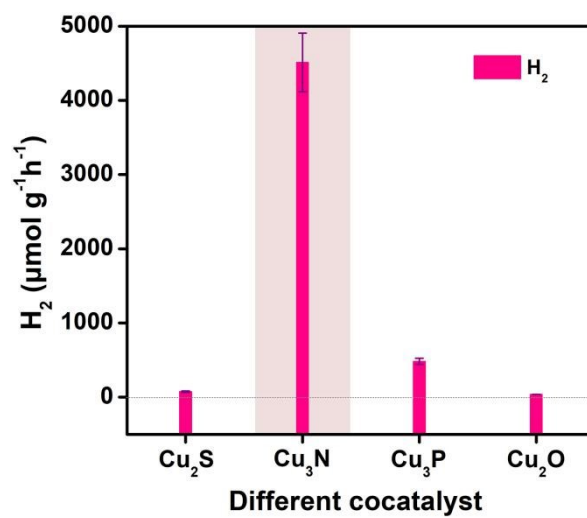

**Fig. S17** Comparison of photocatalytic H<sub>2</sub> generation activity of CdS/Cu<sub>3</sub>N with that of CdS/Cu<sub>2</sub>S, CdS/Cu<sub>3</sub>P, CdS/Cu<sub>2</sub>O under identical conditions.

### 30. UV-vis diffuse reflectance spectra and corresponding *Tauc* Plots of CdS/Cu<sub>3</sub>N

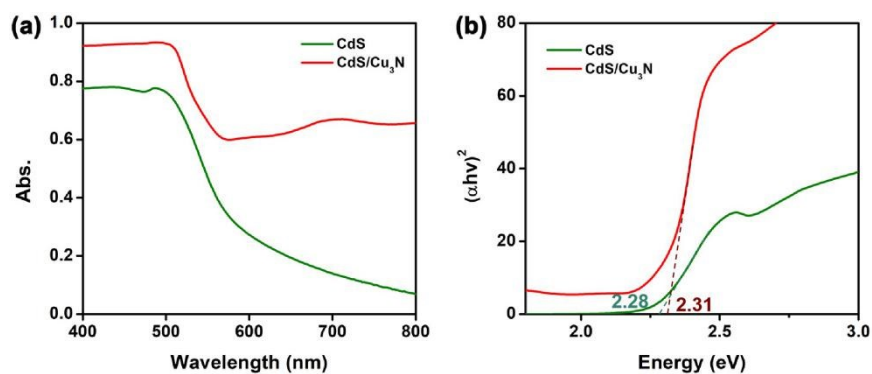

**Fig. S18** (a) UV-vis diffuse reflectance spectra and (b) corresponding *Tauc* plots of obtained CdS and CdS/Cu<sub>3</sub>N. As shown in Fig. S18a, CdS/Cu<sub>3</sub>N exhibits a stronger visible-light absorption and a red-shifted absorption edge compared to CdS, indicating more powerful visible-light harvesting. In addition, CdS/Cu<sub>3</sub>N shows a band gap of  $\sim 2.31$  eV from the corresponding *Tauc* plot (Fig. S18b).

### 31. Mott-Schottky plots of CdS/Cu<sub>3</sub>N

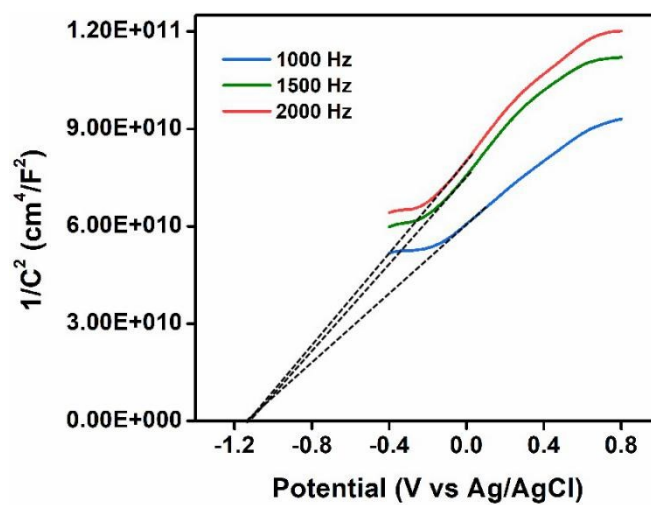

**Fig. S19** Mott-Schottky plots of CdS/Cu<sub>3</sub>N at frequencies of 1000, 1500 and 2000 Hz. As shown in Fig. S19, flat band potential of CdS/Cu<sub>3</sub>N can be estimated as -1.1 V vs Ag/AgCl.<sup>13</sup>

### 32. Band structure diagram of CdS/Cu<sub>3</sub>N

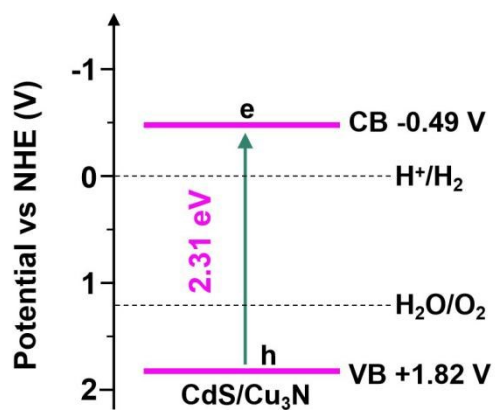

**Fig. S20** Schematic illustration for the band structure of CdS/Cu<sub>3</sub>N. As shown in Fig. S20, it is thermodynamically feasible for the proton reduction reaction on CdS/Cu<sub>3</sub>N.

**33. Table. S3 Fitted parameter of PL lifetime in Fig. 4b**

| Sample                | B <sub>1</sub> | B <sub>2</sub> | τ <sub>1</sub> / ns | τ <sub>2</sub> / ns | τ / ns |
|-----------------------|----------------|----------------|---------------------|---------------------|--------|
| CdS                   | 6.98E-02       | 8.68E-03       | 1.44                | 5.285               | 2.6    |
| CdS/Cu <sub>3</sub> N | 5.49E-02       | 1.51E-02       | 1.64                | 6.89                | 4.5    |

The emission decay of CdS in the absence and presence of Cu<sub>3</sub>N were studied and the decay curves for the samples were well fitted with double-exponential function  $Y(t)$  based on nonlinear least-squares, using the following equation:

$$Y(t) = B_1 \exp(-t / \tau_1) + B_2 \exp(-t / \tau_2)$$

Where B<sub>1</sub>, B<sub>2</sub> are fractional contributions from time-resolved emission decay lifetime τ<sub>1</sub>, τ<sub>2</sub>, as shown in Table S2. The average lifetime τ could be obtained from the following equation:

$$\langle \tau \rangle = \frac{B_1 \tau_1^2 + B_2 \tau_2^2}{B_1 \tau_1 + B_2 \tau_2}$$

### 34. References

1. a) D. D. Vaughn II, J. Araujo, P. Meduri, J. F. Callejas, M. A. Hickner and R. E. Schaak, *Chem. Mater.* 2014, **26**, 6226; b) H. Wu and W. Chen, *J. Am. Chem. Soc.* 2011, **133**, 15236.
2. D. Wang, Y. Li, *Chem. Commun.* 2011, **47**, 3604.
3. Z. Zhuang, Q. Peng, B. Zhang and Y. Li, *J. Am. Chem. Soc.* 2008, **130**, 10482.
4. R. Shen, J. Xie, X. Lu, X. Chen and X. Li, *ACS Sustainable Chem. Eng.* 2018, **6**, 4026.
5. J. Ran, G. Gao, F. T. Li, T. Y. Ma, A. Du and S. Z. Qiao, *Nat Commun* 2017, **8**, 13907.
6. S. Clark, M. Segall, C. Pickard, P. Hasnip, M. Probert, K. Refson and M. Payne, *Z Kristallogr* 2005, **220**, 567.
7. D. Vanderbilt, *Phys Rev B* 1990, **41**, 7892.
8. J. P. Perdew, K. Burke and M. Ernzerhof, *Phys Rev Lett* 1996, **77**, 3865.
9. H. J. Monkhorst, J. D. Pack, *Phys Rev B* 1976, **13**, 5188.
10. J. K. Nørskov, F. Studt, F. Abild-Pedersen and T. Bligaard, *John Wiley & Sons, Inc.*, 2014. **1114**.
11. B. Hinnemann, P. G. Moses, J. Bonde, K. P. Joergensen, J. H. Nielsen, S. Horch, I. Chorkendorff and J. K. Noerskov, *J. Am. Chem. Soc.* 2005, **127**, 5308-5309
12. Z. Wang, L. Xu, F. Huang, L. Qu, J. Li, K. A. Owusu, Z. Liu, Z. Lin, B. Xiang, X. Liu, K. Zhao, X. Liao, W. Yang, Y. B. Cheng and L. Mai, *Adv Engery Mater* 2019, **9**, 1900390.
13. G. Wang, T. Zhang, W. Yu, R. Si, Y. Liu and Z. Zhao, *ACS Catal.* 2020, **10**, 5715.
